# Supplementary material
Source: PubMed Central journal article supplement (PMC6087475)
Supplement: 10-1055-s-0038-1641177-s1800002.pdf [file 10-1055-s-0038-1641177-s1800002.pdf]

**Table S1** Variant prioritization and filtering strategy used to analyze exome sequencing data

|                                            |        |
|--------------------------------------------|--------|
| Total called variants                      | 41,308 |
| Rare variants (< 1%) <sup>a</sup>          | 1,918  |
| Read number (> 20)                         | 1,434  |
| Excluding intergenic and intronic variants | 918    |
| Excluding synonymous variants              | 671    |
| Homozygous variants                        | 84     |
| Shared by all three families <sup>b</sup>  | 1      |

<sup>a</sup>Variant frequency equal to or less than 1% in population databases (gnomAD, 1000 Genomes Project, ExAC, and our in-house data of 377 exomes).

<sup>b</sup>Known variant, in concordance with the observed phenotype.

**Table S2** Regions of homozygosity by descent in probands of all three families, homozygous block (colored) around the *ISCA1* variant locus (green), identified by exome sequencing data from family 1 and family 2 (reported earlier) and family 3 (present family) demonstrates that the *ISCA1* mutation (green) is due to a founder effect

| Shukla et al <sup>4</sup> |                  |          |            |             |                  |          |            |             |                  |          |            |             |                  |          |            |  |  |
|---------------------------|------------------|----------|------------|-------------|------------------|----------|------------|-------------|------------------|----------|------------|-------------|------------------|----------|------------|--|--|
| Family 1                  |                  |          |            |             |                  | Family 2 |            |             |                  |          |            | Family 3    |                  |          |            |  |  |
| Chr                       | Genomic position | Variant  | Zygoty     | Chr         | Genomic position | Variant  | Zygoty     | Chr         | Genomic position | Variant  | Zygoty     | Chr         | Genomic position | Variant  | Zygoty     |  |  |
| chr9                      | 82267732         | G        | Hom        |             |                  |          |            |             |                  |          |            | chr9        | 82323665         | T        | Hom        |  |  |
| chr9                      | 82286286         | G        | Hom        |             |                  |          |            |             |                  |          |            |             |                  |          |            |  |  |
| chr9                      | 82320887         | T        | Hom        | chr9        | 82320887         | T        |            |             |                  |          |            |             |                  |          |            |  |  |
| chr9                      | 84205860         | A        | Hom        | chr9        | 84205860         | A        | Hom        | chr9        | 84205860         | A        | Hom        | chr9        | 84205860         | A        | Hom        |  |  |
|                           |                  |          |            | chr9        | 84214974         | G        |            | chr9        | 84214974         | G        |            | chr9        | 84214974         | G        | Hom        |  |  |
| chr9                      | 84267147         | C        | Hom        | chr9        | 84267147         | C        | Hom        | chr9        | 84267147         | C        | Hom        | chr9        | 84267147         | C        | Hom        |  |  |
|                           |                  |          |            | chr9        | 84268878         | G        |            | chr9        | 84268878         | G        |            | chr9        | 84268878         | G        | Hom        |  |  |
| chr9                      | 85613354         | G        | Hom        | chr9        | 85613354         | G        | Hom        | chr9        | 85613354         | G        | Hom        | chr9        | 85613354         | G        | Hom        |  |  |
| chr9                      | 85677562         | A        | Hom        | chr9        | 85677562         | A        | Hom        | chr9        | 85677562         | A        | Hom        | chr9        | 85677562         | A        | Hom        |  |  |
| chr9                      | 85964563         | T        | Hom        | chr9        | 85964563         | T        | Hom        | chr9        | 85964563         | T        | Hom        | chr9        | 85964563         | T        | Hom        |  |  |
| chr9                      | 85987880         | -        | Hom        | chr9        | 85987880         | -        | Hom        | chr9        | 85987880         | -        | Hom        | chr9        | 85987880         | -        | Hom        |  |  |
| chr9                      | 86153159         | G        | Hom        | chr9        | 86153159         | G        | Hom        | chr9        | 86153159         | G        | Hom        | chr9        | 86153159         | G        | Hom        |  |  |
| chr9                      | 86238086         | C        | Hom        | chr9        | 86238086         | C        | Hom        | chr9        | 86238086         | C        | Hom        | chr9        | 86238086         | C        | Hom        |  |  |
| chr9                      | 86241489         | G        | Hom        | chr9        | 86241489         | G        | Hom        | chr9        | 86241489         | G        | Hom        | chr9        | 86241489         | G        | Hom        |  |  |
| chr9                      | 86278817         | A        | Hom        | chr9        | 86278817         | A        | Hom        | chr9        | 86278817         | A        | Hom        | chr9        | 86278817         | A        | Hom        |  |  |
| chr9                      | 86284178         | A        | Hom        | chr9        | 86284178         | A        | Hom        | chr9        | 86284178         | A        | Hom        | chr9        | 86284178         | A        | Hom        |  |  |
| chr9                      | 86468715         | T        | Hom        | chr9        | 86468715         | T        | Hom        | chr9        | 86468715         | T        | Hom        | chr9        | 86468715         | T        | Hom        |  |  |
| chr9                      | 86504005         | T        | Hom        | chr9        | 86504005         | T        | Hom        | chr9        | 86504005         | T        | Hom        | chr9        | 86504005         | T        | Hom        |  |  |
| chr9                      | 86592026         | G        | Hom        | chr9        | 86592026         | G        | Hom        | chr9        | 86592026         | G        | Hom        | chr9        | 86592026         | G        | Hom        |  |  |
| chr9                      | 87285915         | T        | Hom        | chr9        | 87285915         | T        | Hom        | chr9        | 87285915         | T        | Hom        | chr9        | 87285915         | T        | Hom        |  |  |
| chr9                      | 88694179         | T        | Hom        | chr9        | 88694179         | T        | Hom        | chr9        | 88694179         | T        | Hom        | chr9        | 88694179         | T        | Hom        |  |  |
| <b>chr9</b>               | <b>88881089</b>  | <b>T</b> | <b>Hom</b> | <b>chr9</b> | <b>88881089</b>  | <b>T</b> | <b>Hom</b> | <b>chr9</b> | <b>88881089</b>  | <b>T</b> | <b>Hom</b> | <b>chr9</b> | <b>88881089</b>  | <b>T</b> | <b>Hom</b> |  |  |
| chr9                      | 88924057         | C        | Hom        | chr9        | 88924057         | C        | Hom        | chr9        | 88924057         | C        | Hom        | chr9        | 88924057         | C        | Hom        |  |  |
| chr9                      | 88925774         | G        | Hom        | chr9        | 88925774         | G        | Hom        | chr9        | 88925774         | G        | Hom        | chr9        | 88925774         | G        | Hom        |  |  |
| chr9                      | 90258248         | T        | Hom        |             |                  |          |            |             |                  |          |            |             |                  |          |            |  |  |

**Table S2** (Continued)

| Shukla et al <sup>4</sup> |                  |         |        |      |                  |          |        |     |                  |         |        |          |                  |         |        |  |  |
|---------------------------|------------------|---------|--------|------|------------------|----------|--------|-----|------------------|---------|--------|----------|------------------|---------|--------|--|--|
| Family 1                  |                  |         |        |      |                  | Family 2 |        |     |                  |         |        | Family 3 |                  |         |        |  |  |
| Chr                       | Genomic position | Variant | Zygoty | Chr  | Genomic position | Variant  | Zygoty | Chr | Genomic position | Variant | Zygoty | Chr      | Genomic position | Variant | Zygoty |  |  |
| chr9                      | 90258413         | C       | Hom    |      |                  |          |        |     |                  |         |        |          |                  |         |        |  |  |
| chr9                      | 90258413         | -       | Hom    |      |                  |          |        |     |                  |         |        |          |                  |         |        |  |  |
| chr9                      | 90258415         | C       | Hom    |      |                  |          |        |     |                  |         |        |          |                  |         |        |  |  |
|                           |                  |         |        | chr9 | 94518328         | T        | Hom    |     |                  |         |        |          |                  |         |        |  |  |
| chr9                      | 95219597         | A       | Hom    | chr9 | 95219597         | A        | Hom    |     |                  |         |        |          |                  |         |        |  |  |
| chr9                      | 95738781         | A       | Hom    | chr9 | 95766471         | T        | Hom    |     |                  |         |        |          |                  |         |        |  |  |
| chr9                      | 95780465         | G       | Hom    | chr9 | 95780465         | G        | Hom    |     |                  |         |        |          |                  |         |        |  |  |
|                           |                  |         |        | chr9 | 95838070         | C        | Hom    |     |                  |         |        |          |                  |         |        |  |  |
|                           |                  |         |        | chr9 | 95840077         | G        | Hom    |     |                  |         |        |          |                  |         |        |  |  |
|                           |                  |         |        | chr9 | 95840256         | G        | Hom    |     |                  |         |        |          |                  |         |        |  |  |

Abbreviation: Chr, chromosome.
